# Supplementary material for: Highly Thermotolerant SARS-CoV-2 Vaccine Elicits Neutralising Antibodies against Delta and Omicron in Mice
Source: MDPI journal article supplement (doi:10.3390/v14040800), 2022-04-13
Supplement: s1 [file s1]

# Highly Thermotolerant SARS-CoV-2 Vaccine Elicits Neutralising Antibodies Against Delta and Omicron in Mice

Petrus Jansen van Vuren<sup>1†</sup>, Alexander J. McAuley<sup>1†</sup>, Michael J. Kuiper<sup>2†</sup>, Nagendrakumar B. Singanallur<sup>1</sup>, Matthew P. Bruce<sup>1</sup>, Shane Riddell<sup>1</sup>, Sarah Goldie<sup>1</sup>, Shruthi Mangalaganesh<sup>1,3</sup>, Simran Chahal<sup>1</sup>, Trevor W. Drew<sup>1</sup>, Kim R. Blasdel<sup>1</sup>, Mary Tachedjian<sup>1</sup>, Leon Caly<sup>4</sup>, Julian D. Druce<sup>4</sup>, Shahbaz Ahmed<sup>5</sup>, Mohammad Suhail Khan<sup>5</sup>, Sameer Kumar Malladi<sup>5</sup>, Randhir Singh<sup>6</sup>, Suman Pandey<sup>6</sup>, Raghavan Varadarajan<sup>5</sup> and Seshadri S. Vasan<sup>1,7,\*</sup>

## Supplementary Text A

### *Amino Acid Sequences of Vaccine Formulations*

Vaccine 1/2: mRBD1-3.2 (Monomer)

EISNITNLCPFGEVFNATRFPSVYAWNRKRISNCVADWSVLYNSASFSTFKCYGVSP  
TKLNDLCFTNVYADSFVIRGDEVQRQIAPGQTGKIADYNYKLPPDFTGCVIAWNSNNLDS  
KVGGNYNLYRLFRKSNLKPFRDISTEIQAGSTPCNGVEGFNCYFPLOSQYGFQPTN  
GVGYQPYRVVLSFELLHAPATVCGCLKKSTNGSLEVLFO

Vaccine 3: mRBD1-3.2-beta (Monomer)

EISNITNLCPFGEVFNATRFPSVYAWNRKRISNCVADWSVLYNSASFSTFKCYGVSP  
TKLNDLCFTNVYADSFVIRGDEVQRQIAPGQTGNIADYNYKLPPDFTGCVIAWNSNNLDS  
KVGGNYNLYRLFRKSNLKPFRDISTEIQAGSTPCNGVKGFNCYFPLOSQYGFQPT  
YGVGYQPYRVVLSFELLHAPATVCGCLKKSTNGSLEVLFO  
(Red residues represent mutations relative to Wuhan-Hu-1)

Vaccine 4/5: hCMP-mRBD (Trimer)

EISEEDPCACESLVKFOAKVEGLLQALTRKLEAVSKRLAILENTVVASSEGTMMRGEL  
KNITNLCPFGEVFNATRFASVYAWNRKRISNCVADYSVLYNSASFSTFKCYGVSP  
TKLNDLCFTNVYADSFVIRGDEVQRQIAPGQTGKIADYNYKLPPDFTGCVIAWNSNNLDSK  
VGGNYNLYRLFRKSNLKPFRDISTEIQAGSTPCNGVEGFNCYFPLOSQYGFQPTNG  
VGYQPYRVVLSFELLHAPATVCGPKKSTNGSLEVLFO  
(Orange residues are hCMP; blue residues are the RBD)

Vaccine 6: mRBD-GlyIZ (Trimer)

EISITNLCPFGEVFNATRFASVYAWNRKRISNCVADYSVLYNSASFSTFKCYGVSP  
TKLNDLCFTNVYADSFVIRGDEVQRQIAPGQTGKIADYNYKLPPDFTGCVIAWNSNNLDSK  
VGGNYNLYRLFRKSNLKPFRDISTEIQAGSTPCNGVEGFNCYFPLOSQYGFQPTNG  
VGYQPYRVVLSFELLHAPATVCGPKKSTNAGSGSGSGSAGSNGTGRMKQIEDK  
IENITSKIYNITNEIARIKKLIGNRTAS  
(Orange residues are GlyIZ; blue residues are the RBD)
